# Supplementary material for: IGPred-HDnet: Prediction of Immunoglobulin Proteins Using Graphical Features and the Hierarchal Deep Learning-Based Approach
Source: Comput Intell Neurosci. 2023 Jan 25;2023:2465414. doi: 10.1155/2023/2465414 (PMC9891831; doi:10.1155/2023/2465414)
Supplement: Supplementary Materials — Supplementary File S1 contains the positive samples (immunoglobulins sequences). Supplementary File S2 contains the negative samples (nonimmunoglobulins sequences). [file 2465414.f1.zip]

Archive with 2 entries (2 files):
- Supplementary File S1.txt
- Supplementary File S2.txt
